# Supplementary material for: The Epidemiology of First-Episode Psychosis in Early Intervention in Psychosis Services: Findings From the Social Epidemiology of Psychoses in East Anglia [SEPEA] Study
Source: Atypon-hosted journal article supplement (doi:10.1176/appi.ajp.2016.16010103), 2016-10-24
Supplement: appi.ajp.2016.16010103.ds001.pdf [file appi.ajp.2016.16010103.ds001.pdf]

 


Psychiatry Online
