# Supplementary material for: The Epidemiology of First-Episode Psychosis in Early Intervention in Psychosis Services: Findings From the Social Epidemiology of Psychoses in East Anglia [SEPEA] Study
Source: Atypon-hosted journal article supplement (doi:10.1176/appi.ajp.2016.16010103), 2016-10-24
Supplement: appi.ajp.2016.16010103.ds001.pdf [file appi.ajp.2016.16010103.ds001.pdf]

**Supplementary Table 1: Neighborhood-level characteristics of the SEPEA study catchment – description, summary and representativeness**

| Environmental variable                | Description                                                                                                                                                          | Catchment (N=530) |             | Rest of England (N=7,159) |             | Median difference <sup>^</sup> |                  |         |
|---------------------------------------|----------------------------------------------------------------------------------------------------------------------------------------------------------------------|-------------------|-------------|---------------------------|-------------|--------------------------------|------------------|---------|
|                                       |                                                                                                                                                                      | Median            | IQR         | Median                    | IQR         | Diff.                          | 95%CI            | p-value |
| <b>Population density</b>             | People per square mile                                                                                                                                               | 588               | (209-4,653) | 3,646                     | (573-8,976) | -3,583                         | (-4,347, -2,818) | <0.01   |
| <b>Ethnicity</b>                      | % of population from black and minority ethnic groups                                                                                                                | 5.5               | (3.5-11.1)  | 6.7                       | (4.0-15.7)  | -1.2                           | (-1.8, -0.5)     | 0.01    |
| <b>Multiple deprivation</b>           | % of households in 2 or more of the domains below:                                                                                                                   | 20.6              | (16.7-25.7) | 21.4                      | (16.3-28.3) | -0.7                           | (-1.8, 0.3)      | 0.14    |
| <i>Employment domain</i>              | % of households with at least one adult member reported as long-term sick or unemployed, not in full time study                                                      | N/A               |             | N/A                       |             |                                |                  | -       |
| <i>Education domain</i>               | % of households without any member with at least “Level 2” education (≥5 GCSEs or equivalent) or in full-time study                                                  | N/A               |             | N/A                       |             |                                |                  | -       |
| <i>Health &amp; disability domain</i> | % of households with at least one member’s self-rated health as “bad” or “very bad”, or with a limiting long-term health problem                                     | N/A               |             | N/A                       |             |                                |                  | -       |
| <i>Living environment domain</i>      | % of households with at least one of the following: (i) in overcrowding <sup>†</sup> ; (ii) living in a shared dwelling <sup>‡</sup> , (iii) without central heating | N/A               |             | N/A                       |             |                                |                  | -       |

IQR – Interquartile range; GCSE – General Certificate for Secondary Education, mandatory for children in 10<sup>th</sup> and 11<sup>th</sup> years of education. N/A: Domain-specific deprivation data not published by the Office for National Statistics.

<sup>^</sup>Obtained from quantile regression

<sup>†</sup>ONS definition of overcrowding based on number of rooms and people per household, weighted for age and relationship status.

<sup>‡</sup>A unit of accommodation shared by two or more households.

**Legend:** Neighborhood-level variation in population density, ethnicity and deprivation varied across the 530 neighborhoods in the SEPEA region. The SEPEA region was, however, substantially more rural than the rest of England ( $p < 0.01$ ). Median differences in neighborhood-level ethnic composition (-1.2%; 95%CI: -1.8, -0.5;  $p = 0.01$ ) and multiple deprivation (-0.7%; 95%CI: -1.8, 0.3;  $p = 0.14$ ) between the SEPEA region and the rest of England were small, but only met statistical significance for the former. 2011 Census data were obtained from: Table QS119EW (deprivation); Table PHP01 (population density), and; Table KS201EW (ethnicity); see [www.nomisweb.co.uk](http://www.nomisweb.co.uk).

**Supplementary Table 2: Multivariable Poisson analysis of non-affective and affective psychotic disorders by major sociodemographic characteristics**

IRR: incidence rate ratio

| Variable                                        | Non-affective psychoses |         |                  |                           | Affective psychoses |         |                  |                           |
|-------------------------------------------------|-------------------------|---------|------------------|---------------------------|---------------------|---------|------------------|---------------------------|
|                                                 | N                       | %       | IRR <sup>†</sup> | 95%CI                     | N                   | %       | IRR <sup>†</sup> | 95%CI                     |
| <b>Total cases</b>                              | 571                     | (100.0) | -                |                           | 84                  | (100.0) | -                |                           |
| <b>Sex</b>                                      |                         |         |                  |                           |                     |         |                  |                           |
| Women                                           | 185                     | (32.3)  | Ref              |                           | 36                  | (42.9)  | Ref              |                           |
| Men                                             | 388                     | (67.7)  | 1.97             | (1.65, 2.35) <sup>‡</sup> | 48                  | (57.1)  | 1.27             | (0.82, 1.96)              |
| <b>Age group</b>                                |                         |         |                  |                           |                     |         |                  |                           |
| 16-24                                           | 368                     | (64.2)  | Ref              |                           | 51                  | (60.7)  | Ref              |                           |
| 25-29                                           | 118                     | (20.6)  | 0.64             | (0.52, 0.81) <sup>‡</sup> | 24                  | (28.6)  | 0.72             | (0.43, 1.22)              |
| 30-35                                           | 87                      | (15.2)  | 0.45             | (0.35, 0.58) <sup>‡</sup> | 9                   | (10.7)  | 0.24             | (0.11, 0.51) <sup>‡</sup> |
| <b>Ethnicity</b>                                |                         |         |                  |                           |                     |         |                  |                           |
| White British                                   | 434                     | (75.7)  | Ref              |                           | 53                  | (64.3)  | Ref              |                           |
| Black & minority ethnic groups                  | 139                     | (24.3)  | 1.41             | (1.15, 1.71) <sup>‡</sup> | 30                  | (36.7)  | 2.30             | (1.44, 3.68) <sup>‡</sup> |
| <b>Participant socioeconomic status</b>         |                         |         |                  |                           |                     |         |                  |                           |
| Professional & managerial                       | 58                      | (10.1)  | Ref              |                           | 12                  | (14.3)  | Ref              |                           |
| Intermediate occupation                         | 63                      | (11.0)  | 1.53             | (1.07, 2.19) <sup>‡</sup> | 13                  | (15.5)  | 1.55             | (0.70, 3.42)              |
| Routine & manual                                | 232                     | (40.5)  | 2.41             | (1.80, 3.24) <sup>‡</sup> | 31                  | (36.9)  | 1.47             | (0.74, 2.92)              |
| Long-term unemployed, students & unclassifiable | 220                     | (38.4)  | 2.37             | (1.73, 3.24) <sup>‡</sup> | 28                  | (33.3)  | 1.17             | (0.56, 2.44)              |
| <b>Early intervention psychosis service</b>     |                         |         |                  |                           |                     |         |                  |                           |
| N. Cambridgeshire                               | 71                      | (12.4)  | Ref              |                           | 18                  | (21.4)  | Ref              |                           |
| S. Cambridgeshire                               | 130                     | (22.7)  | 1.29             | (0.96, 1.73)              | 29                  | (34.5)  | 1.19             | (0.65, 2.16)              |
| West Norfolk                                    | 28                      | (4.9)   | 1.10             | (0.71, 1.70)              | 5                   | (6.0)   | 0.85             | (0.31, 2.31)              |
| Central Norfolk                                 | 129                     | (22.5)  | 1.14             | (0.85, 1.53)              | 13                  | (15.5)  | 0.51             | (0.25, 1.04)              |
| Great Yarmouth & Waveney                        | 63                      | (11.0)  | 1.68             | (1.19, 2.37) <sup>‡</sup> | 14                  | (16.8)  | 1.73             | (0.85, 3.53)              |
| Suffolk                                         | 152                     | (26.5)  | 1.37             | (1.03, 1.82) <sup>‡</sup> | 5                   | (6.0)   | 0.19             | (0.07, 0.51) <sup>‡</sup> |

<sup>†</sup>Adjusted for all other variables listed in table

<sup>‡</sup>p<0.05

**Supplementary Table 3: Neighborhood level variation in the incidence of non-affective and affective psychotic disorders**

| Variable                                                        | Non-affective psychoses* |         |                  |                           | Affective psychoses^ |         |                  |                           |
|-----------------------------------------------------------------|--------------------------|---------|------------------|---------------------------|----------------------|---------|------------------|---------------------------|
|                                                                 | N                        | %       | IRR <sup>†</sup> | 95%CI                     | N                    | %       | IRR <sup>†</sup> | 95%CI                     |
| <b>Total cases</b>                                              | 548                      | (100.0) | -                |                           | 83                   | (100.0) |                  | -                         |
| <b>Neighborhood population density (People per square mile)</b> |                          |         |                  |                           |                      |         |                  |                           |
| 48-587 (Below median)                                           | 110                      | (20.1)  | Ref              |                           | 19                   | (22.9)  | Ref              |                           |
| 588-4,653 (50-75 <sup>th</sup> percentile)                      | 154                      | (28.1)  | 1.31             | (1.01, 1.70) <sup>‡</sup> | 20                   | (24.1)  | 0.77             | (0.39, 1.53)              |
| 4,654-11,099 (76-95 <sup>th</sup> percentile)                   | 185                      | (33.8)  | 1.20             | (0.92, 1.57)              | 24                   | (28.9)  | 0.99             | (0.49, 2.01)              |
| 11,100-21,970 (96-100 <sup>th</sup> percentile)                 | 99                       | (18.1)  | 1.30             | (0.95, 1.77)              | 20                   | (24.1)  | 1.59             | (0.74, 3.44)              |
| <b>Neighborhood multiple deprivation (% households)</b>         |                          |         |                  |                           |                      |         |                  |                           |
| 7.8-18.0%                                                       | 129                      | (23.5)  | Ref              |                           | 28                   | (33.7)  | Ref              |                           |
| 18.1-28.0%                                                      | 243                      | (44.3)  | 1.47             | (1.15, 1.89) <sup>‡</sup> | 33                   | (39.8)  | 0.81             | (0.43, 1.51)              |
| 28.1-38.0%                                                      | 132                      | (24.1)  | 1.46             | (1.07, 2.00) <sup>‡</sup> | 17                   | (20.5)  | 0.67             | (0.28, 1.58)              |
| 38.1-47.1%                                                      | 44                       | (8.0)   | 2.74             | (1.71, 4.39) <sup>‡</sup> | 5                    | (6.0)   | 0.44             | (0.12, 1.57)              |
| <b>Early Intervention Psychosis service</b>                     |                          |         |                  |                           |                      |         |                  |                           |
| North Cambridgeshire                                            | 70                       | (12.8)  | Ref              |                           | 18                   | (21.7)  | Ref              |                           |
| South Cambridgeshire                                            | 121                      | (22.1)  | 1.68             | (1.19, 2.38) <sup>‡</sup> | 28                   | (33.7)  | 1.00             | (0.48, 2.11)              |
| West Norfolk                                                    | 27                       | (4.9)   | 1.12             | (0.70, 1.79)              | 5                    | (6.0)   | 1.00             | (0.34, 2.94)              |
| Central Norfolk                                                 | 126                      | (23.0)  | 1.28             | (0.93, 1.76)              | 13                   | (15.7)  | 0.50             | (0.23, 1.09)              |
| Great Yarmouth & Waveney                                        | 61                       | (11.1)  | 1.41             | (0.97, 2.05)              | 14                   | (16.9)  | 2.10             | (0.94, 4.71)              |
| Suffolk                                                         | 143                      | (26.1)  | 1.58             | (1.15, 2.17) <sup>‡</sup> | 5                    | (6.0)   | 0.18             | (0.06, 0.50) <sup>‡</sup> |

IRR: incidence rate ratio; EIP: Early Intervention Psychosis

†Adjusted for all other variables listed in table and age group (three-category), sex, ethnicity and participant SES, as described

‡p<0.05

\*25 FEP participants of no fixed abode was excluded from analysis

^One FEP participant of no fixed abode was excluded from these analysis

**Supplemental Figure 1: Rate of contact in Early Intervention Psychosis services by contact type**

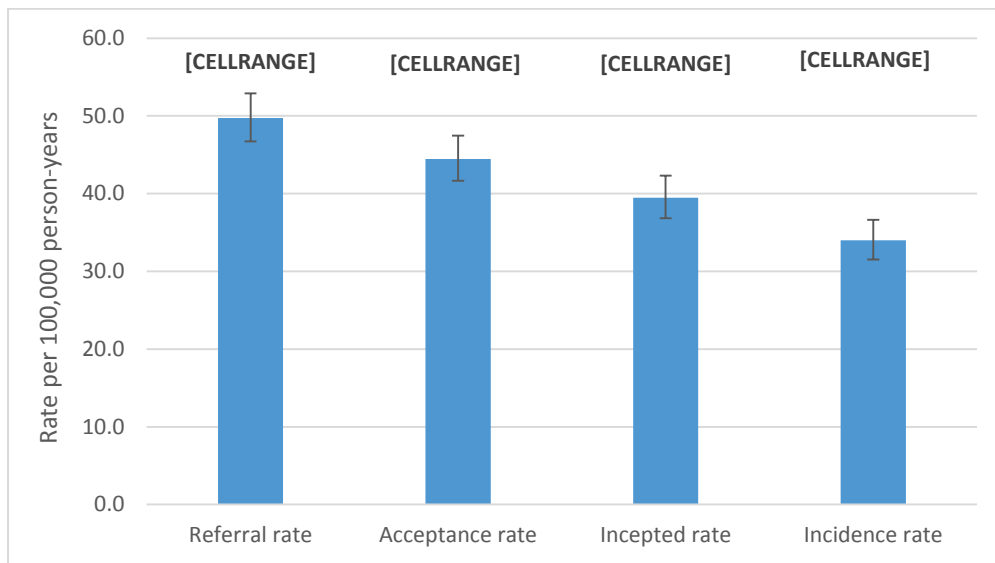

**Legend**

*Referral rate:* Number of referrals per 100,000 person-years

*Acceptance rate:* Number of referrals accepted by Early Intervention Psychosis services, per 100,000 person-years

*Incepted rate:* Number of accepted referrals who met epidemiological criteria, per 100,000 years

*Incidence rate:* Number of the incepted sample who received an OPCRIT-confirmed diagnosis for first episode psychosis, per 100,000 person years
